# Supplementary material for: Self-Reported Pain and Emotional Reactivity in Bipolar Disorder: A Prospective FACE-BD Study
Source: MDPI journal article supplement (doi:10.3390/jcm11030893), 2022-02-08
Supplement: s1 [file s1]

Table S2: Eigenvalue and variance explained by each dimension of the PCA.

| PCA Dimension | Eigenvalue | Percentage of variance explained by the dimension | Cumulative percentage of variance |
|---------------|------------|---------------------------------------------------|-----------------------------------|
| Dimension 1   | 3.025      | 60.493                                            | 60.493                            |
| Dimension 2   | 0.654      | 13.085                                            | 73.578                            |
| Dimension 3   | 0.577      | 11.534                                            | 85.112                            |
| Dimension 4   | 0.444      | 8.873                                             | 93.985                            |
| Dimension 5   | 0.301      | 6.015                                             | 100.00                            |
