# Supplementary material for: Self-Reported Pain and Emotional Reactivity in Bipolar Disorder: A Prospective FACE-BD Study
Source: MDPI journal article supplement (doi:10.3390/jcm11030893), 2022-02-08
Supplement: s1 [file s1]

Table S1: Sociodemographic and clinical characteristics of patients lost and not lost to follow-up.

| Variable                               |       | Patients lost to follow-up<br>Mean (sd)/ Number (%) | Patients not lost<br>to follow-up<br>Mean (sd)/ Number (%) | P -value |
|----------------------------------------|-------|-----------------------------------------------------|------------------------------------------------------------|----------|
| <b>Sociodemographic</b>                |       |                                                     |                                                            |          |
| Age (years)                            |       | 38.85 (12.23)                                       | 42.58 (12.94)                                              | <0.0001  |
| Sex                                    | Men   | 207(38.6)                                           | 141(41)                                                    | 0.53     |
|                                        | Women | 329(61.4)                                           | 203(59)                                                    |          |
| Single                                 | No    | 266 (49.6)                                          | 187 (54.4)                                                 | 0.19     |
|                                        | Yes   | 270 (50.4)                                          | 157 (45.6)                                                 |          |
| Education<br>(High school<br>diploma)  | No    | 186(34.7)                                           | 144(41.9)                                                  | 0.04     |
|                                        | Yes   | 350(65.3)                                           | 200(58.1)                                                  |          |
| <b>Clinical</b>                        |       |                                                     |                                                            |          |
| BD subtype                             | I     | 246(45.9)                                           | 163(47.4)                                                  | 0.17     |
|                                        | II    | 227(42.4)                                           | 154(44.8)                                                  |          |
|                                        | NOS   | 63(11.8)                                            | 27(7.8)                                                    |          |
| Age at BD onset<br>(years)             |       | 23.082(8.928)                                       | 24.347(9.556)                                              | 0.05     |
| Number of<br>depressive episodes       |       | 5.234(4.947)                                        | 5.366(4.605)                                               | 0.72     |
| Number of manic<br>episodes            |       | 1.074(2.146)                                        | 1.074(2.07)                                                | 1        |
| Number of<br>hypomanic episodes        |       | 3.821(5.471)                                        | 2.985(4.075)                                               | 0.03     |
| Lifetime history of<br>suicide attempt | No    | 364(67.9)                                           | 220(64)                                                    | 0.25     |
|                                        | Yes   | 172(32.1)                                           | 124(36)                                                    |          |
| Current substance<br>use disorder      | No    | 469(87.5)                                           | 314(91.3)                                                  | 0.1      |
|                                        | Yes   | 67(12.5)                                            | 30(8.7)                                                    |          |
| Lifetime anxiety<br>disorder           | No    | 311(58)                                             | 220(64)                                                    | 0.09     |
|                                        | Yes   | 225(42)                                             | 124(36)                                                    |          |
| Lifetime eating<br>disorder            | No    | 424(79.1)                                           | 286(83.1)                                                  | 0.16     |
|                                        | Yes   | 112(20.9)                                           | 58(16.9)                                                   |          |
| Multiple sclerosis                     | No    | 515(99.6)                                           | 334(99.4)                                                  | 0.65     |
|                                        | Yes   | 2(0.4)                                              | 2(0.6)                                                     |          |
| Cancer                                 | No    | 481(96.8)                                           | 322(97.6)                                                  | 0.65     |
|                                        | Yes   | 16(3.2)                                             | 8(2.4)                                                     |          |
| Inflammatory bowel<br>disease          | No    | 513(99.4)                                           | 330(98.8)                                                  | 0.44     |
|                                        | Yes   | 3(0.6)                                              | 4(1.2)                                                     |          |
| Rheumatoid<br>arthritis                | No    | 523(99.8)                                           | 338(100)                                                   | 1        |

|                                                        |           |                |                |         |
|--------------------------------------------------------|-----------|----------------|----------------|---------|
|                                                        | Yes       | 1(0.2)         | 0(0)           |         |
| Ulcer                                                  | No        | 498(96.7)      | 322(96.7)      | 1       |
|                                                        | Yes       | 17(3.3)        | 11(3.3)        |         |
| QIDS-SR<br>(without item 12)<br>Box Cox<br>Transformed |           | 5.321(2.579)   | 5.224(2.547)   | 0.59    |
| Suicidal ideation<br>(QIDS-SR item 12)                 | No<br>(0) | 372(69.4)      | 234(68)        | 0.72    |
|                                                        | Yes (>1)  | 164(30.6)      | 110(32)        |         |
| YMRS                                                   | 0         | 269(50.2)      | 193(56.1)      | 0.12    |
|                                                        | [1-7]     | 216(40.3)      | 115(33.4)      |         |
|                                                        | > 7       | 51(9.5)        | 36(10.5)       |         |
| PSQI [0-21]                                            |           | 7.159(3.899)   | 6.959(3.799)   | 0.46    |
| STAI-Y (state) [0-60]                                  |           | 42.771(14.583) | 42.177(14.087) | 0.55    |
| MAThYS Emotional<br>[0-40]                             |           | 21.266(6.684)  | 21.675(6.681)  | 0.38    |
| MAThYS Motivation<br>[0-40]                            |           | 17.195(7.083)  | 17.288(6.932)  | 0.85    |
| MAThYS Cognition<br>[0-40]                             |           | 20.357(6.132)  | 20.482(6.147)  | 0.77    |
| MAThYS Sensory<br>perception [0-50]                    |           | 25.605(5.454)  | 26.296(4.928)  | 0.06    |
| MAThYS<br>Psychomotor [0-30]                           |           | 12.7(5.736)    | 12.515(5.333)  | 0.63    |
| AIM                                                    |           | 3.724(0.678)   | 3.707(0.701)   | 0.72    |
| ALS                                                    |           | 1.271(0.684)   | 1.249(0.687)   | 0.65    |
| BDHI<br>Expressive<br>Component                        |           | 21.192(8.218)  | 20.078(7.751)  | 0.045   |
| BDHI<br>Attitudinal<br>Component                       |           | 7.563(4.404)   | 7.23(4.244)    | 0.27    |
| BIS-10                                                 |           | 67.377(11.522) | 66.805(11.121) | 0.47    |
| Lithium carbonate                                      | No        | 366(68.3)      | 202(58.7)      | 0.005   |
|                                                        | Yes       | 170(31.7)      | 142(41.3)      |         |
| Anticonvulsant                                         | No        | 295(55)        | 129(37.5)      | <0.0001 |
|                                                        | Yes       | 241(45)        | 215(62.5)      |         |
| Antipsychotic                                          | No        | 320(59.7)      | 157(45.6)      | 0.0001  |
|                                                        | Yes       | 216(40.3)      | 187(54.4)      |         |
| Anxiolytic                                             | No        | 424(79.1)      | 233(67.7)      | 0.0002  |
|                                                        | Yes       | 112(20.9)      | 111(32.3)      |         |
| Hypnotic                                               | No        | 468(87.3)      | 269(78.2)      | 0.0005  |
|                                                        | Yes       | 68(12.7)       | 75(21.8)       |         |
| Antidepressant                                         | No        | 356(66.4)      | 171(49.7)      | <0.0001 |
|                                                        | Yes       | 180(33.6)      | 173(50.3)      |         |

**QIDS-SR** Quick Inventory of Depressive Self-report; **YMRS** Young Mania Rating Scale; **PSQI** Pittsburgh Sleep Quality Index; **STAI-Y** State-Trait Anxiety Inventory; **MAThys** Multidimensional Assessment of Thymic States; **AIM** Affect Intensity Measure; **ALS** Affective Lability Scale; **BDHI** Buss-Durkee Hostility Inventory; **BIS-10** Barratt Impulsiveness Scale
